# Supplementary material
Source: PubMed Central journal article supplement (PMC7510871)
Supplement: boe-11-9-5258-s001.pdf [file boe-11-9-5258-s001.pdf]

## Study on the effects of terahertz radiation on gene networks of *Escherichia coli* by means of fluorescent biosensors: supplement

DANIL S. SERDYUKOV,<sup>1,2,3,\*</sup> 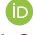 TATIANA N. GORYACHKOVSKAYA,<sup>1,2</sup>  
IRINA A. MESCHERYAKOVA,<sup>1,2</sup> SVETLANA V. BANNIKOVA,<sup>1,2</sup> SERGEI  
A. KUZNETSOV,<sup>4,5</sup> OLGA P. CHERKASOVA,<sup>3</sup> VASILIIY M. POPIK,<sup>6</sup>  
AND SERGEY E. PELTEK<sup>1,2</sup>

<sup>1</sup>Laboratory of Molecular Biotechnologies of Federal Research Center Institute of Cytology and Genetics of the Siberian Branch of the Russian Academy of Sciences, 10 Lavrentiev Avenue, Novosibirsk 630090, Russia

<sup>2</sup>Kurchatov Genomics Center of Federal Research Center Institute of Cytology and Genetics of the Siberian Branch of the Russian Academy of Sciences, 10 Lavrentiev Avenue, Novosibirsk 630090, Russia

<sup>3</sup>Institute of Laser Physics of the Siberian Branch of the Russian Academy of Sciences, 15B Lavrentiev Avenue, Novosibirsk 630090, Russia

<sup>4</sup>Physics Department, Novosibirsk State University, 2 Pirogov Street, Novosibirsk 630090, Russia

<sup>5</sup>Technological Design Institute of Applied Microelectronics, Rzhanov Institute of Semiconductor Physics of the Siberian Branch of the Russian Academy of Sciences, 2/1 Lavrentiev Avenue, Novosibirsk 630090, Russia

<sup>6</sup>Budker Institute of Nuclear Physics of the Siberian Branch of the Russian Academy of Sciences, 11 Lavrentiev Avenue, Novosibirsk 630090, Russia

\* [serdyukov@protonmail.com](mailto:serdyukov@protonmail.com)

This supplement published with The Optical Society on 25 August 2020 by The Authors under the terms of the [Creative Commons Attribution 4.0 License](https://creativecommons.org/licenses/by/4.0/) in the format provided by the authors and unedited. Further distribution of this work must maintain attribution to the author(s) and the published article's title, journal citation, and DOI.

Supplement DOI: <https://doi.org/10.6084/m9.figshare.12743894>

Parent Article DOI: <https://doi.org/10.1364/BOE.400432>

# A study on effects of terahertz radiation on gene networks of *Escherichia coli* by means of fluorescent biosensors: supplemental document

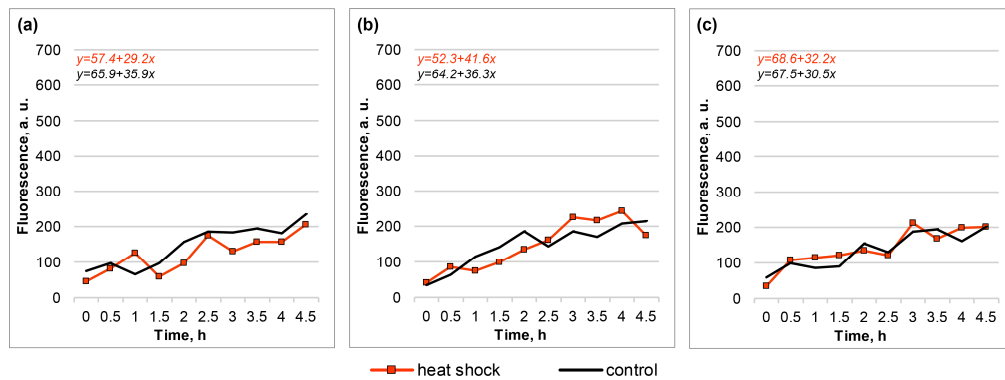

Fig. S1. Fluorescence dynamics (fluorescence curves and the respective linear regression equations) of biosensor cells in response to heat shock (heating at 42°C for 30 min): *E. coli*/pMatA-TurboGFP (a), *E. coli*/pSafA TurboGFP (b), and *E. coli*/pChbB-TurboYFP (c), as compared to the control. Results of one independent replication are presented.

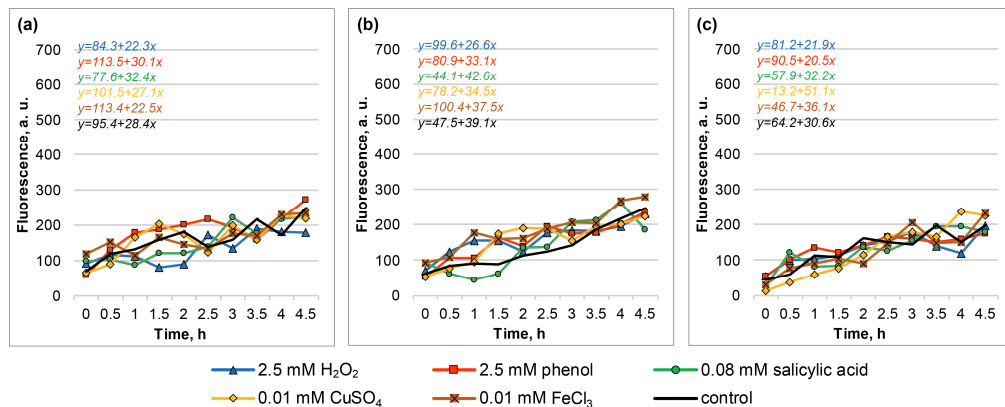

Fig. S2. Fluorescence dynamics (fluorescence curves and the respective linear regression equations) of biosensor cells in response to chemical stressors (2.5 mM hydrogen peroxide (H<sub>2</sub>O<sub>2</sub>), 2.5 mM phenol, 0.08 mM salicylic acid, 0.01 mM Cu(II) sulfate (CuSO<sub>4</sub>), or 0.01 mM Fe(III) chloride (FeCl<sub>3</sub>)): *E. coli*/pMatA-TurboGFP (a), *E. coli*/pSafA TurboGFP (b), and *E. coli*/pChbB-TurboYFP (c), as compared to the control. Results of one independent replication are presented.

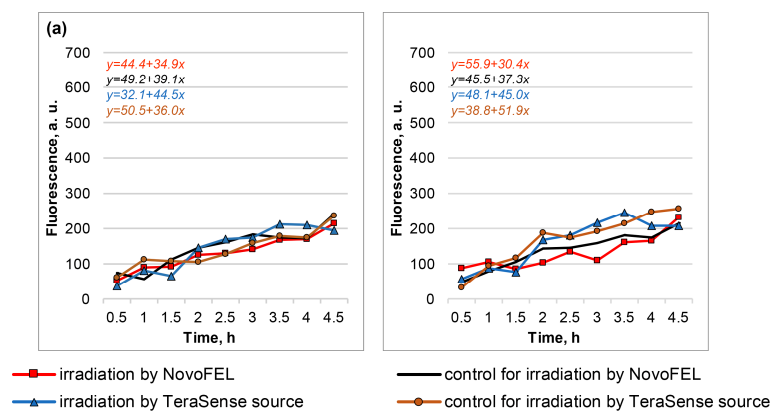

Fig. S3. Fluorescence dynamics (fluorescence curves and the respective linear regression equations) of *E. coli* cells harboring basic vector pTurboGFP-B (a) or pTurboYFP-B (b), in response to 30-minute THz irradiation by NovoFEL or the TeraSense source, in comparison with the respective control (bulk heating). Results of one independent replication are presented.
